# Supplementary material for: An incentive circuit for memory dynamics in the mushroom body of Drosophila melanogaster
Source: eLife. 2022 Apr 1;11:e75611. doi: 10.7554/eLife.75611 (PMC8975552; doi:10.7554/eLife.75611)
Supplement: Figure 3—source data 1. [file elife-75611-fig3-data1.xlsx]

## Sheet: PIs_all_experiments
Condition code	Experimental condition PI												Experimental control PI										Mean condition PI	Mean control PI	Fraction to CS+ (Condition)	Fraction to CS+ (Control)	PI difference (Condition - Control)	Number of Condition Experiments	Number of Control Experiments	PI difference (binomial adjustment used in paper)	Paper	Figure	Testing time (miutes after training)	Plausible model	Cell types	Condition Codes Key
																																				For Condition Code ABCD (e.g. 1323):
1111																							#DIV/0!	#DIV/0!	#DIV/0!	#DIV/0!	#DIV/0!	0	0	#DIV/0!
1112																							#DIV/0!	#DIV/0!	#DIV/0!	#DIV/0!	#DIV/0!	0	0	#DIV/0!						A - Intervention protocol	B - target neuron	C - genetic intervention	D - reward type
1113																							#DIV/0!	#DIV/0!	#DIV/0!	#DIV/0!	#DIV/0!	0	0	#DIV/0!						1: Training (CS+ only)	1: +ve MBON	1: shibire block	1: aversive
1121																							#DIV/0!	#DIV/0!	#DIV/0!	#DIV/0!	#DIV/0!	0	0	#DIV/0!						2: Training (CS+ and CS-)	2: -ve MBON	2: dTrpA1 activation	2: appetitive
1122																							#DIV/0!	#DIV/0!	#DIV/0!	#DIV/0!	#DIV/0!	0	0	#DIV/0!						3: Testing only	3: +ve DAN		3: no reinforcement
1123																							#DIV/0!	#DIV/0!	#DIV/0!	#DIV/0!	#DIV/0!	0	0	#DIV/0!						4: Training (CS+ and CS-) and testing	4: -ve DAN
1211																							#DIV/0!	#DIV/0!	#DIV/0!	#DIV/0!	#DIV/0!	0	0	#DIV/0!
1212																							#DIV/0!	#DIV/0!	#DIV/0!	#DIV/0!	#DIV/0!	0	0	#DIV/0!						Paper Key
1213																							#DIV/0!	#DIV/0!	#DIV/0!	#DIV/0!	#DIV/0!	0	0	#DIV/0!						Shorthand	Full reference
1221																							#DIV/0!	#DIV/0!	#DIV/0!	#DIV/0!	#DIV/0!	0	0	#DIV/0!						2009claridge-chang.miesenbock	Claridge-Chang et al. (2009), Writing memories with light addressable reinforcement circuitry, Cell 139, 405-415
1222																							#DIV/0!	#DIV/0!	#DIV/0!	#DIV/0!	#DIV/0!	0	0	#DIV/0!						2010aso.tanimoto	Aso et al. (2010), Specific dopaminergic neurons for the formation of labile aversive memory, Current Biology 20, 1445-1451
1223	0.15												0	-0.05									0.15	-0.025	0.575	0.4875	0.175	1	2	0.876714	2015ichinose.tanimoto	5B	1440	sm	MBON a1	2012burke.waddell	Burke et al. (2012), Layered reward signalling through octopamine and dopamine in Drosophila, Nature 492, 433-437
1311																							#DIV/0!	#DIV/0!	#DIV/0!	#DIV/0!	#DIV/0!	0	0	#DIV/0!						2012liu.tanimoto	Liu et al. (2012), A subset of dopamine neurons signals reward for odour memory in Drosophila, Nature 488, 512-516
1312																							#DIV/0!	#DIV/0!	#DIV/0!	#DIV/0!	#DIV/0!	0	0	#DIV/0!						2013placais.preat	Placais et al. (2013), Two pairs of mushroom body efferent neurons are required for appetitive long-term memory retrieval in Drosophila, Cell Reports 5, 769-780
1313																							#DIV/0!	#DIV/0!	#DIV/0!	#DIV/0!	#DIV/0!	0	0	#DIV/0!						2014aso.rubin	Aso et al. (2014), Mushroom body output neurons encode valence and guide memory-based action selection in Drosophila, eLife 3:e04580
1321																							#DIV/0!	#DIV/0!	#DIV/0!	#DIV/0!	#DIV/0!	0	0	#DIV/0!						2014lin.waddell	Lin et al. (2014), Neural correlates of water reward in thirsty Drosophila, Nature Neuroscience 17, 1536-1542
1322																							#DIV/0!	#DIV/0!	#DIV/0!	#DIV/0!	#DIV/0!	0	0	#DIV/0!						2015huetteroth.waddell	Huetteroth et al. (2015), Sweet taste and nutrient value subdivide rewarding dopaminergic neurons in Drosophila, Current Biology 25, 751-758
1323	0.47	0.48	0.49	0.78									0.08	0.05	0.09	0.07	0.09	0.11					0.555	0.0816667	0.7775	0.540833	0.473333	4	6	2.49654	2012burke.waddell	3F,3I	3	d	DAN PAM cluster	2015ichinose.tanimoto	Ichinose et al. (2015), Reward signal in a recurrent circuit drives appetitive long-term memory formation, eLife 4:e10719
1323	0.29												-0.12	-0.05									0.29	-0.085	0.645	0.4575	0.375	1	2	1.88493	2012liu.tanimoto	1D	2	d	DAN PAM cluster	2015owald.waddell	Owald et al. (2015), Activity of defined mushroom body output neurons underlies learned olfactory behaviour in Drosophila, Neuron 86, 417-427
1323	0.46												0.27	0.27									0.46	0.27	0.73	0.635	0.19	1	2	1.0204	2014lin.waddell	3I	3	d	DAN PAM Y4	2016aso.rubin	Aso & Rubin (2016), Dopaminergic neurons write and update memories with cell-type-specific rules, eLife 5:e16135
1323	0.3	0.39	0.11	0.16	0.15	0.12	0.13	0.03					0.02	0.02	0.03	0.03	0.01	0.01	-0.04	0.03	0.03	0.07	0.17375	0.021	0.586875	0.5105	0.15275	8	10	0.767397	2015huetteroth.waddell	3J	1440	dc	DAN PAM inc. any of a1, B1, B2	2016perisse.waddell	Perisse et al. (2016), Aversive learning and appetitive motivation toggle feed-forward inhibition in the Drosophila mushroom body, Neuron 90, 1086-1099
1323	0.36	0.3	0.47	0.35	0.28	0.48	0.46	0.34	0.43	0.37	0.34	0.45	0										0.385833	0	0.692917	0.5	0.385833	12	1	1.9661	2016aso.rubin	2B, 3C, 3D, 3E	1	d	DAN PAM a1, or B1B2, or Y5B'2 (60s odour + 30x1s light)	2016yamagata.tanimoto	Yamagata et al. (2016), Supression of dopamine neurons mediates reward, PLoS Biology 14, e1002586
1323	0.23	0.19	0.06										0										0.16	0	0.58	0.5	0.16	3	1	0.802572	2016aso.rubin	3B	1440	dc	DAN PAM a1, or B1B2, or Y5B'2 (60s odour + 30x1s light)	2017felsenberg.waddell	Felsenberg et al. (2017), Re-evaluation of learned information in Drosophila, Nature 544, 240-244
1323	0.16	0.14	0.22										0										0.173333	0	0.586667	0.5	0.173333	3	1	0.86994	2016aso.rubin	2B	1	d	DAN PAM a1, or B1B2 (10s odour + 3x1s light)
1411																							#DIV/0!	#DIV/0!	#DIV/0!	#DIV/0!	#DIV/0!	0	0	#DIV/0!
1412																							#DIV/0!	#DIV/0!	#DIV/0!	#DIV/0!	#DIV/0!	0	0	#DIV/0!
1413	0.13	0.12											-0.15	-0.19	-0.11	-0.07							0.125	-0.13	0.5625	0.435	0.255	2	4	1.275	2016yamagata.tanimoto	4B, 4D	2	d	DAN PAM Y3
1421																							#DIV/0!	#DIV/0!	#DIV/0!	#DIV/0!	#DIV/0!	0	0	#DIV/0!
1422																							#DIV/0!	#DIV/0!	#DIV/0!	#DIV/0!	#DIV/0!	0	0	#DIV/0!
1423	NA												NA										#DIV/0!	#DIV/0!	#DIV/0!	#DIV/0!	-0.29	0	0	#DIV/0!	2009claridge-chang.miesenbock	5A	7		DAN PPL1 cluster
1423	-0.43	-0.19	-0.15										-0.03	-0.03	-0.03								-0.256667	-0.03	0.371667	0.485	-0.226667	3	3	-1.14516	2010aso.tanimoto	3A	2	d	DAN PPL1 cluster + DAN PAM B2B'2
1423	-0.59												0	0	-0.02	-0.06							-0.59	-0.02	0.205	0.49	-0.57	1	4	-2.99259	2010aso.tanimoto	4B	2	d	DAN PPL1 Y1-pedc
1423	-0.15												-0.09	-0.14									-0.15	-0.115	0.425	0.4425	-0.035	1	2	-0.176557	2010aso.tanimoto	4F	2	c	DAN PPL1 a2a'2
1423	0.04												-0.11	-0.06									0.04	-0.085	0.52	0.4575	0.125	1	2	0.625158	2010aso.tanimoto	4H	2	c	DAN PAM B1B'2 (supposedly aversive)
1423	-0.53	-0.57											0	-0.09	-0.03								-0.55	-0.04	0.225	0.48	-0.51	2	3	-2.66877	2012liu.tanimoto		2	d	DAN PAM cluster
1423	-0.54												0	0									-0.54	0	0.23	0.5	-0.54	1	2	-2.80415	2014aso.rubin	6G	3	d	DAN PPL1 Y1-pedc
1423	0.6	0.28	0.59	0.32	0.6	0.36	0.66	0.25	0.6	0.37	0.16		0										0.435455	0	0.717727	0.5	0.435455	11	1	2.23079	2016aso.rubin	2B, 2C, 3C, 3D, 3E	1	cf	DAN PPL1 Y1-pedc, a'2a2 + Y2a'1, a3 (60s odour + 30x1s light)
1423	0.13	0.08											0										0.105	0	0.5525	0.5	0.105	2	1	0.525725	2016aso.rubin	3B	1440	f	DAN PPL1 Y1-pedc, a'2a2 + Y2a'1 (60s odour + 30x1s light)
1423	0.46	0.16											0										0.31	0	0.655	0.5	0.31	2	1	1.56896	2016aso.rubin	2B	1	c	DAN PPL1 Y1-pedc, a'2a2 + Y2a'1 (10s odour + 3x1s light)
1423	0.17	0.37	0.29										0										0.276667	0	0.638333	0.5	0.276667	3	1	1.39676	2016aso.rubin	2C	1440	f	DAN PPL1 Y1-pedc, a'2a2 + Y2a'1, a3 (60s odour + 30x1s light, repeated 10 times)
1423	0.07	0.2	0.22										0										0.163333	0	0.581667	0.5	0.163333	3	1	0.819404	2016aso.rubin	2C	5760	c	DAN PPL1 Y1-pedc, a'2a2 + Y2a'1, a3 (60s odour + 30x1s light, repeated 10 times)
1423	-0.4	-0.43											-0.13	-0.11	-0.07								-0.415	-0.103333	0.2925	0.448333	-0.311667	2	3	-1.61346	2016yamagata.tanimoto	2A	0	d	DAN PAM Y3
2111																							#DIV/0!	#DIV/0!	#DIV/0!	#DIV/0!	#DIV/0!	0	0	#DIV/0!
2112	0.31												0.35	0.37									0.31	0.36	0.655	0.68	-0.05	1	2	-0.265331	2013placais.preat	2C	1440	s	MBON MB-V3
2113																							#DIV/0!	#DIV/0!	#DIV/0!	#DIV/0!	#DIV/0!	0	0	#DIV/0!
2121																							#DIV/0!	#DIV/0!	#DIV/0!	#DIV/0!	#DIV/0!	0	0	#DIV/0!
2122																							#DIV/0!	#DIV/0!	#DIV/0!	#DIV/0!	#DIV/0!	0	0	#DIV/0!
2123																							#DIV/0!	#DIV/0!	#DIV/0!	#DIV/0!	#DIV/0!	0	0	#DIV/0!
2211																							#DIV/0!	#DIV/0!	#DIV/0!	#DIV/0!	#DIV/0!	0	0	#DIV/0!
2212	0.13	0.17											0.42	0.36	0.35								0.15	0.376667	0.575	0.688333	-0.226667	2	3	-1.1748	2015ichinose.tanimoto	3H	1440	r	MBON a1
2213																							#DIV/0!	#DIV/0!	#DIV/0!	#DIV/0!	#DIV/0!	0	0	#DIV/0!
2221																							#DIV/0!	#DIV/0!	#DIV/0!	#DIV/0!	#DIV/0!	0	0	#DIV/0!
2222																							#DIV/0!	#DIV/0!	#DIV/0!	#DIV/0!	#DIV/0!	0	0	#DIV/0!
2223																							#DIV/0!	#DIV/0!	#DIV/0!	#DIV/0!	#DIV/0!	0	0	#DIV/0!
2311																							#DIV/0!	#DIV/0!	#DIV/0!	#DIV/0!	#DIV/0!	0	0	#DIV/0!
2312	0.12												0.41	0.33									0.12	0.37	0.56	0.685	-0.25	1	2	-1.28929	2012liu.tanimoto	2L	30	dc	DAN PAM cluster
2312	-0.05	0.03	0.08										0.24	0.22	0.2	0.27	0.23						0.02	0.232	0.51	0.616	-0.212	3	5	-1.06852	2015huetteroth.waddell	3A	1440	dc	DAN PAM, multiple drivers that label at least Y5b
2312	0.06												0.38	0.27									0.06	0.325	0.53	0.6625	-0.265	1	2	-1.35025	2015ichinose.tanimoto	3D	1440	dc	DAN PAM a1
2313																							#DIV/0!	#DIV/0!	#DIV/0!	#DIV/0!	#DIV/0!	0	0	#DIV/0!
2321																							#DIV/0!	#DIV/0!	#DIV/0!	#DIV/0!	#DIV/0!	0	0	#DIV/0!
2322																							#DIV/0!	#DIV/0!	#DIV/0!	#DIV/0!	#DIV/0!	0	0	#DIV/0!
2323																							#DIV/0!	#DIV/0!	#DIV/0!	#DIV/0!	#DIV/0!	0	0	#DIV/0!
2411	-0.1	-0.21	-0.3										-0.35	-0.35	-0.47	-0.42							-0.203333	-0.3975	0.398333	0.30125	0.194167	3	4	1.01785	2010aso.tanimoto	1G	30	c	DAN PPL1 cluster + DAN PAM B2B'2
2412	0.12												0.29	0.26									0.12	0.275	0.56	0.6375	-0.155	1	2	-0.790572	2016yamagata.tanimoto	2D	30	cf	DAN PAM Y3
2413																							#DIV/0!	#DIV/0!	#DIV/0!	#DIV/0!	#DIV/0!	0	0	#DIV/0!
2421																							#DIV/0!	#DIV/0!	#DIV/0!	#DIV/0!	#DIV/0!	0	0	#DIV/0!
2422																							#DIV/0!	#DIV/0!	#DIV/0!	#DIV/0!	#DIV/0!	0	0	#DIV/0!
2423																							#DIV/0!	#DIV/0!	#DIV/0!	#DIV/0!	#DIV/0!	0	0	#DIV/0!
3111	0.24	0.33											0.27	0.27	0.34	0.31							0.285	0.2975	0.6425	0.64875	-0.0125	2	4	-0.0653324	2013placais.preat	5A, 5B (right column)	1440	r	MBON MB-V3, inc. ChAT RNAi knockdown of Ach, 5 x spaced training trials
3111	0.26	0.23											0.23	0.2	0.2	0.29							0.245	0.23	0.6225	0.615	0.015	2	4	0.0772091	2013placais.preat	5A, 5B (middle column)	1440	r	MBON MB-V3, inc. ChAT RNAi knockdown of Ach, 5 x massed training trials
3111	0.4	0.58											0.39	0.37	0.48	0.58							0.49	0.455	0.745	0.7275	0.035	2	4	0.198563	2013placais.preat	5A, 5B (left column)	120	m	MBON MB-V3, inc. ChAT RNAi knockdown of Ach
3111	-0.14	-0.19											-0.3	-0.26	-0.28	-0.3	-0.41						-0.165	-0.31	0.4175	0.345	0.145	2	5	0.746355	2016perisse.waddell	2G	30	s	MBON Y1-pedc
3111	-0.19	-0.2											-0.21	-0.28	-0.19	-0.2	-0.22						-0.195	-0.22	0.4025	0.39	0.025	2	5	0.127781	2016perisse.waddell	2H	180	s	MBON Y1-pedc
3112	0												0.2	0.25									0	0.225	0.5	0.6125	-0.225	1	2	-1.13219	2013placais.preat	2A	1440	r	MBON MB-V3
3112	0.2												0.3	0.23									0.2	0.265	0.6	0.6325	-0.065	1	2	-0.334157	2013placais.preat	2E	120	srm	MBON MB-V3
3112	0.31												0.37	0.31									0.31	0.34	0.655	0.67	-0.03	1	2	-0.15861	2013placais.preat	2D	30	rm	MBON MB-V3
3112	0.07	0.04											0.29	0.2	0.26	0.33	0.29						0.055	0.274	0.5275	0.637	-0.219	2	5	-1.11012	2016perisse.waddell	6B	30	s	MBON Y1-pedc
3112	0.08												0.28	0.24	0.4								0.08	0.306667	0.54	0.653333	-0.226667	1	3	-1.15513	2016perisse.waddell	6C	180	s	MBON Y1-pedc
3112	0.08	0.12											0.42	0.37	0.3	0.31	0.51						0.1	0.382	0.55	0.691	-0.282	2	5	-1.45282	2016perisse.waddell	6D	1440	srm	MBON Y1-pedc
3112	0.26												0.27	0.22									0.26	0.245	0.63	0.6225	0.015	1	2	0.0775116	2017felsenberg.waddell	3B	180	rm	MBON MB-V2 (a2sc + a'1 + a2p3p + a'3ap + a'3m)
3112	0.04												0.26	0.18									0.04	0.22	0.52	0.61	-0.18	1	2	-0.907703	2017felsenberg.waddell	4B	180	s	MBON Y2a'1
3113																							#DIV/0!	#DIV/0!	#DIV/0!	#DIV/0!	#DIV/0!	0	0	#DIV/0!
3121	0.24												0.22	0.29									0.24	0.255	0.62	0.6275	-0.015	1	2	-0.0774083	2013placais.waddell	5C	1440	sm	MBON MB-V3, 5 x spaced training trials
3121	-0.1	-0.24											-0.41	-0.39	-0.34	-0.45	-0.42						-0.17	-0.402	0.415	0.299	0.232	2	5	1.21057	2016perisse.waddell	2I	30	srm	MBON Y1-pedc
3122	0.07												0.23	0.21									0.07	0.22	0.535	0.61	-0.15	1	2	-0.758011	2013placais.preat	4A	1440	m	MBON MB-V3
3122	0.27												0.26	0.29									0.27	0.275	0.635	0.6375	-0.005	1	2	-0.0259833	2013placais.preat	4A	120	sm	MBON MB-V3
3122	0.17	0.16											0	0.03	0.04	0.05	-0.02						0.165	0.02	0.5825	0.51	0.145	2	5	0.728122	2016perisse.waddell	6F	180	srm	MBON Y1-pedc (food sated before testing)
3122	0.28	0.36											0.22	0.24	0.22	0.23	0.2						0.32	0.222	0.66	0.611	0.098	2	5	0.509049	2016perisse.waddell	6G	180	sm	MBON Y1-pedc (starved before testing)
3123																							#DIV/0!	#DIV/0!	#DIV/0!	#DIV/0!	#DIV/0!	0	0	#DIV/0!
3211	0												-0.15	-0.14									0	-0.145	0.5	0.4275	0.145	1	2	0.726913	2015owald.waddell	3F	120	m	MBON B'2mp, Y5B'2a
3212	0.09	0.12											0.29	0.29	0.28								0.105	0.286667	0.5525	0.643333	-0.181667	2	3	-0.926268	2015ichinose.tanimoto	8A	1440	srm	MBON a1
3212	-0.03												0.22	0.15									-0.03	0.185	0.485	0.5925	-0.215	1	2	-1.07824	2015owald.waddell	2A2	1440	sr	MBON B2B'2a, B'2mp, Y5B'2a
3212	0.06												0.25	0.25									0.06	0.25	0.53	0.625	-0.19	1	2	-0.961622	2015owald.waddell	2B2	1440	sm	MBON B'2mp, Y5B'2a
3212	0.19												0.39	0.36									0.19	0.375	0.595	0.6875	-0.185	1	2	-0.964278	2015owald.waddell	2C2	1440	sm	MBON Y5B'2a
3212	0.01												0.18	0.12									0.01	0.15	0.505	0.575	-0.14	1	2	-0.702251	2015owald.waddell	3E	120	srm	MBON B'2mp, Y5B'2a
3213																							#DIV/0!	#DIV/0!	#DIV/0!	#DIV/0!	#DIV/0!	0	0	#DIV/0!
3221																							#DIV/0!	#DIV/0!	#DIV/0!	#DIV/0!	#DIV/0!	0	0	#DIV/0!
3222																							#DIV/0!	#DIV/0!	#DIV/0!	#DIV/0!	#DIV/0!	0	0	#DIV/0!
3223																							#DIV/0!	#DIV/0!	#DIV/0!	#DIV/0!	#DIV/0!	0	0	#DIV/0!
3311																							#DIV/0!	#DIV/0!	#DIV/0!	#DIV/0!	#DIV/0!	0	0	#DIV/0!
3312	0.25												0.22	0.3									0.25	0.26	0.625	0.63	-0.01	1	2	-0.0517095	2012liu.tanimoto	2M	30	d	DAN PAM cluster
3312	0.36	0.19	0.23										0.28	0.19	0.17	0.12	0.2	0.18					0.26	0.19	0.63	0.595	0.07	3	6	0.359211	2014lin.waddell	2E, 4F	30	dcf	DAN PAM cluster
3312	0.24												0.33	0.24									0.24	0.285	0.62	0.6425	-0.045	1	2	-0.233177	2015ichinose.tanimoto	8B	1440	d	DAN PAM a1
3313																							#DIV/0!	#DIV/0!	#DIV/0!	#DIV/0!	#DIV/0!	0	0	#DIV/0!
3321																							#DIV/0!	#DIV/0!	#DIV/0!	#DIV/0!	#DIV/0!	0	0	#DIV/0!
3322																							#DIV/0!	#DIV/0!	#DIV/0!	#DIV/0!	#DIV/0!	0	0	#DIV/0!
3323																							#DIV/0!	#DIV/0!	#DIV/0!	#DIV/0!	#DIV/0!	0	0	#DIV/0!
3411																							#DIV/0!	#DIV/0!	#DIV/0!	#DIV/0!	#DIV/0!	0	0	#DIV/0!
3412	0.2												0.07	0.04	0.07								0.2	0.06	0.6	0.53	0.14	1	3	0.705991	2016perisse.waddell	Supplementary 5G	180	dc	DAN PPL1 y1-pedc (food sated before testing)
3412	0.35												0.41	0.31	0.22								0.35	0.313333	0.675	0.656667	0.0366667	1	3	0.194333	2016perisse.waddell	Supplementary 5H	180	df	DAN PPL1 y1-pedc (starved before testing)
3412	0.18												0.16	0.16									0.18	0.16	0.59	0.58	0.02	1	2	0.101477	2017felsenberg.waddell	2E	180	cf	DAN PPL1 Y2a'1
3413																							#DIV/0!	#DIV/0!	#DIV/0!	#DIV/0!	#DIV/0!	0	0	#DIV/0!
3421																							#DIV/0!	#DIV/0!	#DIV/0!	#DIV/0!	#DIV/0!	0	0	#DIV/0!
3422																							#DIV/0!	#DIV/0!	#DIV/0!	#DIV/0!	#DIV/0!	0	0	#DIV/0!
3423																							#DIV/0!	#DIV/0!	#DIV/0!	#DIV/0!	#DIV/0!	0	0	#DIV/0!
4111	-0.12	-0.25	-0.36										-0.48	-0.49	-0.46	-0.56	-0.58						-0.243333	-0.514	0.378333	0.243	0.270667	3	5	1.46222	2014aso.rubin	6B, 6C	120	sm	MBON Y1-pedc (olfactory, two different drivers)
4111	-0.02	-0.08	-0.03										-0.14	-0.11	-0.16	-0.16	-0.13						-0.0433333	-0.14	0.478333	0.43	0.0966667	3	5	0.485377	2014aso.rubin	8B, 8C	1.5	sr	MBON Y1-pedc (visual, two different drivers)
4111	-0.16	-0.13	-0.15	-0.16	-0.05	-0.09	-0.1						-0.13										-0.12	-0.13	0.44	0.435	0.01	7	1	0.0503953	2014aso.rubin	8B	1.5	m	MBON a3 + a'2, a'2 + Y2a'1, Y2a'1, a2a3 + a'3 + a'1, a'3, a2 + a2a3 + a'3 + a'1 (visual)
4111	-0.3	-0.46	-0.5										-0.46										-0.42	-0.46	0.29	0.27	0.04	3	1	0.222718	2014aso.rubin	6B	120	s	MBON a1, a'2 , a2 + a3 + a'3 + a'1 (olfactory)
4112	0.16												0.46	0.47									0.16	0.465	0.58	0.7325	-0.305	1	2	-1.6054	2013placais.preat	3B	1440	sm	MBON MB-V3: RNAi experiment to knockdown Ach transmission in MB-V3.
4112	0.19	0.34											0.2	0.18	0.42	0.32							0.265	0.28	0.6325	0.64	-0.015	2	4	-0.07795	2013placais.preat	2F, 3C	120	rm	MBON MB-V3 Possible was a weak driver too -- not the same driver as in 2014aso.rubin below). Includes RNAi experiment to knockdown Ach transmission in MB-V3.
4112	0.09	0.12	0.25	0.09	0.09	0.19	0.46						0.45										0.184286	0.45	0.592143	0.725	-0.265714	7	1	-1.40089	2014aso.rubin	7B	120	s	MBON a3 + a'2, a'2, a'2 + Y2a'1, Y2a'1, a2 + a'1, a2 + a2a3 + a'3 +a'1 (olfactory)
4112	0.1	0.23	0.1	0.2	0.15	0.19	0.17	0.07	0.12	0.17	0.11		0.16										0.146364	0.16	0.573182	0.58	-0.0136364	11	1	-0.0689961	2014aso.rubin	9B	120	rm	MBON a3 + a'2, a'2, a'2 + Y2a'1, Y2a'1, a2sc + a'3m, a'3m + a'3ap + a'1, a2p3p + a'3m + a'1, a'3m + a'3ap, a2sc + a'1, a2sc + a2p3p + a'3m + a'3ap + a'1 (visual)
4113																							#DIV/0!	#DIV/0!	#DIV/0!	#DIV/0!	#DIV/0!	0	0	#DIV/0!
4121																							#DIV/0!	#DIV/0!	#DIV/0!	#DIV/0!	#DIV/0!	0	0	#DIV/0!
4122																							#DIV/0!	#DIV/0!	#DIV/0!	#DIV/0!	#DIV/0!	0	0	#DIV/0!
4123																							#DIV/0!	#DIV/0!	#DIV/0!	#DIV/0!	#DIV/0!	0	0	#DIV/0!
4211	-0.04	-0.06	-0.04	-0.07	-0.11	-0.13							-0.13										-0.075	-0.13	0.4625	0.435	0.055	6	1	0.276456	2014aso.rubin	8B	1.5	m	MBON Y4, Y4 + B1, B1, B'2 + Y5B'2, Y5B'2 + B'2, B'2 (visual)
4211	-0.38	-0.35	-0.38										-0.46										-0.37	-0.46	0.315	0.27	0.09	3	1	0.494603	2014aso.rubin	6B	120	srm	MBON Y4 + B1, Y5B'2a + B'2mp, Y5B'2a + B'2mp + B'2mp (olfactory)
4211	-0.32												-0.61	-0.63									-0.32	-0.62	0.34	0.19	0.3	1	2	1.6994	2015owald.waddell	2A3	3	srm	MBON B2B'2a, B'2mp, Y5B'2a
4211	-0.05												-0.41	-0.4									-0.05	-0.405	0.475	0.2975	0.355	1	2	1.8228	2015owald.waddell	2B3	3	sm	MBON B'2mp, Y5B'2a
4211	-0.22												-0.47	-0.42									-0.22	-0.445	0.39	0.2775	0.225	1	2	1.19287	2015owald.waddell	2C3	3	rm	MBON Y5B'2a
4212	0.16	0.39	0.4	0.17									0.44										0.28	0.44	0.64	0.72	-0.16	4	1	-0.857493	2014aso.rubin	7B	120	rm	MBON B'2mp-bilateral + Y5B'2a + B'2mp, Y5B'2a + B'2mp, a1 (olfactory)
4212	0.06	0.09	0.18	0.1	0.1	0.16	0.18	0.16					0.16										0.12875	0.16	0.564375	0.58	-0.03125	8	1	-0.157904	2014aso.rubin	9B	120	rm	MBON Y4, Y4 + B1, B'2 + Y5B'2 + B'2, Y5B'2 + B'2, B2B'2, a1 (visual)
4212	0.26	0.45											0.39	0.42	0.34								0.355	0.383333	0.6775	0.691667	-0.0283333	2	3	-0.152434	2015ichinose.tanimoto	3G	5	m	MBON a1
4212	0.18												0.37	0.43									0.18	0.4	0.59	0.7	-0.22	1	2	-1.14939	2015owald.waddell	2A1	3	m	MBON B2B'2a, B'2mp, Y5B'2a
4212	0.04												0.39	0.4									0.04	0.395	0.52	0.6975	-0.355	1	2	-1.81854	2015owald.waddell	2B1	3	r	MBON B'2mp, Y5B'2a
4212	0.26												0.39	0.41									0.26	0.4	0.63	0.7	-0.14	1	2	-0.74154	2015owald.waddell	2C1	3	m	MBON Y5B'2a
4213																							#DIV/0!	#DIV/0!	#DIV/0!	#DIV/0!	#DIV/0!	0	0	#DIV/0!
4221																							#DIV/0!	#DIV/0!	#DIV/0!	#DIV/0!	#DIV/0!	0	0	#DIV/0!
4222																							#DIV/0!	#DIV/0!	#DIV/0!	#DIV/0!	#DIV/0!	0	0	#DIV/0!
4223																							#DIV/0!	#DIV/0!	#DIV/0!	#DIV/0!	#DIV/0!	0	0	#DIV/0!
4311																							#DIV/0!	#DIV/0!	#DIV/0!	#DIV/0!	#DIV/0!	0	0	#DIV/0!
4312	0												0.25	0.33	0.3								0	0.293333	0.5	0.646667	-0.293333	1	3	-1.4827	2012burke.waddell	3G	3	cf	DAN PAM cluster
4312	0.23												0.45	0.52	0.44								0.23	0.47	0.615	0.735	-0.24	1	3	-1.28103	2012burke.waddell	3H	3	d	DAN PAM cluster
4312	0.16												0.53	0.45	0.53								0.16	0.503333	0.58	0.751667	-0.343333	1	3	-1.81967	2012liu.tanimoto	2N	2	c	DAN PAM cluster
4312	-0.1												0.32	0.41	0.36								-0.1	0.363333	0.45	0.681667	-0.463333	1	3	-2.33701	2014lin.waddell	3D	3	f	DAN PAM cluster
4312	0.12												0.31	0.45									0.12	0.38	0.56	0.69	-0.26	1	2	-1.34263	2014lin.waddell	3A	3	f	DAN PAM Y4
4312	0.2												0.68	0.58	0.56								0.2	0.606667	0.6	0.803333	-0.406667	1	3	-2.22209	2015huetteroth.waddell	2H	3	c	DAN PAM B'2, Y5
4312	0.25												0.29	0.41									0.25	0.35	0.625	0.675	-0.1	1	2	-0.524142	2015ichinose.tanimoto	3C	5	dcf	DAN PAM a1
4313																							#DIV/0!	#DIV/0!	#DIV/0!	#DIV/0!	#DIV/0!	0	0	#DIV/0!
4321																							#DIV/0!	#DIV/0!	#DIV/0!	#DIV/0!	#DIV/0!	0	0	#DIV/0!
4322																							#DIV/0!	#DIV/0!	#DIV/0!	#DIV/0!	#DIV/0!	0	0	#DIV/0!
4323																							#DIV/0!	#DIV/0!	#DIV/0!	#DIV/0!	#DIV/0!	0	0	#DIV/0!
4411	-0.14	-0.33	-0.39										-0.46	-0.46	-0.51	-0.5							-0.286667	-0.4825	0.356667	0.25875	0.195833	3	4	1.06075	2010aso.tanimoto	1E	30	dc	DAN PPL1 cluster + DAN PAM B2B'2
4411	-0.26												-0.46										-0.26	-0.46	0.37	0.27	0.2	1	1	1.07187	2014aso.rubin	6C	120	c	DAN PPL1 Y1-pedc (olfactory)
4411	-0.02												-0.11	-0.1									-0.02	-0.105	0.49	0.4475	0.085	1	2	0.425833	2014aso.rubin	8C	120	cf	DAN PPL1 Y1-pedc (visual)
4411	-0.74	-0.67											-0.86	-0.73	-0.78								-0.705	-0.79	0.1475	0.105	0.085	2	3	0.639808	2016yamagata.tanimoto	2B	2	c	DAN PAM Y3
4412	-0.31	-0.35	-0.36										-0.39	-0.34	-0.38	-0.41							-0.34	-0.38	0.33	0.31	0.04	3	4	0.214373	2010aso.tanimoto	1F	30	f	DAN PPL1 cluster + DAN PAM B2B'2
4412	0.47												0.38	0.35									0.47	0.365	0.735	0.6825	0.105	1	2	0.577763	2014lin.waddell	2D	3	d	DAN PPL1 cluster
4412	0.03	0.21											0.43	0.42	0.27	0.25	0.37	0.41	0.41	0.43			0.12	0.37375	0.56	0.686875	-0.25375	2	8	-1.30928	2016yamagata.tanimoto	2C, 2E	2	cf	DAN PAM Y3
4413																							#DIV/0!	#DIV/0!	#DIV/0!	#DIV/0!	#DIV/0!	0	0	#DIV/0!
4421																							#DIV/0!	#DIV/0!	#DIV/0!	#DIV/0!	#DIV/0!	0	0	#DIV/0!
4422																							#DIV/0!	#DIV/0!	#DIV/0!	#DIV/0!	#DIV/0!	0	0	#DIV/0!
4423																							#DIV/0!	#DIV/0!	#DIV/0!	#DIV/0!	#DIV/0!	0	0	#DIV/0!
Total # conditions:	206
Total # controls:	237
Total # experiments:	443
